# Supplementary material for: The high-performance and mechanism of P-doped activated carbon as a catalyst for air-cathode microbial fuel cells
Source: Royal Society of Chemistry journal article supplement (doi:10.1039/c5ta04595a), 2015-01-01
Supplement: c5ta04595a1.pdf [file c5ta04595a1.pdf]

## Supplementary Information

### **The high-performance and mechanism of P-doped activated carbon as a catalyst for air-cathode microbial fuel cells**

Yunting Liu <sup>a</sup>, Kexun Li <sup>a,b\*</sup>, Yi Liu <sup>a</sup>, Liangtao Pu <sup>a</sup>, Zhihao Chen <sup>a</sup>, Shuguang Deng <sup>b</sup>

<sup>a</sup>The College of Environmental Science and Engineering, Nankai University, Tianjin, 300071,  
China

<sup>b</sup>Department of Chemical & Materials Engineering, New Mexico State University, Las Cruces,  
NM, 88003, U.S.A.

\* Corresponding author: Likx@nankai.edu.cn

### **Text 1.** Pretreatments of AC

Step one: The AC powders ( $2132 \text{ m}^2 \text{ g}^{-1}$ , Yihuan Carbon Co. Ltd., Fujian, China) were impregnated with 1 M  $\text{H}_3\text{PO}_4$  solutions and stirred with a magnetic stirrer at a room temperature for 5 hours in order to achieve a complete loading/adsorption of  $\text{H}_3\text{PO}_4$  solution on AC.

Step two: The mixture was dried in an vacuum oven at  $100 \text{ }^\circ\text{C}$  for 24 h.

Step three: the samples were placed in a vacuum tube furnace for a heat-treatment in a flow of  $\text{N}_2$  (flow rate= $100 \text{ mL min}^{-1}$ ) at a given temperature.<sup>1</sup> The samples were heated in the range from room temperature to  $200 \text{ }^\circ\text{C}$ ,  $400 \text{ }^\circ\text{C}$ ,  $600 \text{ }^\circ\text{C}$ ,  $800 \text{ }^\circ\text{C}$  and  $1000 \text{ }^\circ\text{C}$  respectively with a heating rate  $10 \text{ }^\circ\text{C min}^{-1}$  and maintained at the control temperature for 40 min.

Step four: The resultant carbon sample was thoroughly washed with distilled water several times until the pH of washings filtrate was close to neutral and oven-dried at  $110 \text{ }^\circ\text{C}$  overnight.<sup>2</sup>

**Text 2.** The composition of PBS

The PBS contained  $\text{NH}_4\text{Cl}$  ( $0.31 \text{ g L}^{-1}$ ),  $\text{KCl}$  ( $0.13 \text{ g L}^{-1}$ ),  $\text{NaH}_2\text{PO}_4 \cdot 2\text{H}_2\text{O}$  ( $3.321 \text{ g L}^{-1}$ ),  $\text{Na}_2\text{HPO}_4$  ( $4.090 \text{ g L}^{-1}$ ), trace mineral ( $12.5 \text{ mL L}^{-1}$ ), and a vitamin ( $5 \text{ mL L}^{-1}$ ) solution.<sup>3</sup>

### **Text 3.** Electrochemical and material analysis

#### **FTIR**

The surface functionalities of AC were qualitatively revealed on Fourier transform infrared spectroscopy (FTIR). The FTIR spectra of the samples were recorded between  $400\text{ cm}^{-1}$  and  $4000\text{ cm}^{-1}$  in a Bio-Rad FTS 6000 spectrometer. Sample-KBr pellets were prepared by mixing powder with KBr before measurement.

#### **SEM**

Scanning electron microscope (SEM) equipped with an energy-dispersive X-ray spectrometer (S-3500N, Hitachi) was performed to observe the morphology of the samples. The microstructures and shapes with a magnification of 1000 times were respectively observed.

#### **Text 4.** The result and discussion of FTIR

As shown in Fig. S4, the FTIR spectra reflected the functional groups and structures of the treated ACs, together with that of RAW-SP. It was observed that notable new peaks appeared in treated samples compared to RAW-SP. For the original AC, the major bands at  $1154\text{ cm}^{-1}$  and  $1216\text{ cm}^{-1}$  were attributed to the stretching of C-O<sup>4</sup>. The band at  $1561\text{ cm}^{-1}$  was attributed to the C=C stretch.<sup>5</sup> All treated samples revealed almost similar trends. The strongest absorption shoulders present at around  $1152\text{ cm}^{-1}$ ,  $1210\text{ cm}^{-1}$ ,  $1536\text{ cm}^{-1}$ , and  $1633\text{ cm}^{-1}$  were assigned to stretching vibration of the C-O, C=C, and C=O<sup>6</sup>, respectively. The weak peak at around  $1029\text{ cm}^{-1}$  was due to the P-O stretching vibration of the P modified AC.<sup>4,7</sup> A new band near  $3292\text{ cm}^{-1}$  was discerned in SP-1000, which was corresponded to O-H.<sup>6,8</sup> The intensity of the bands at  $1633\text{ cm}^{-1}$  and  $3292\text{ cm}^{-1}$ , corresponding to oxygen-containing groups<sup>9</sup>, increased slightly after P modification.

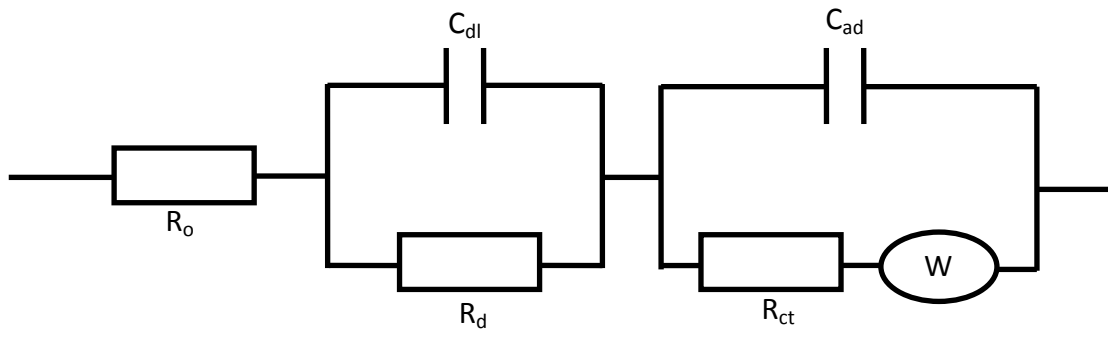

Figure S1. Equivalent circuits for modeling the EIS of air cathodes.

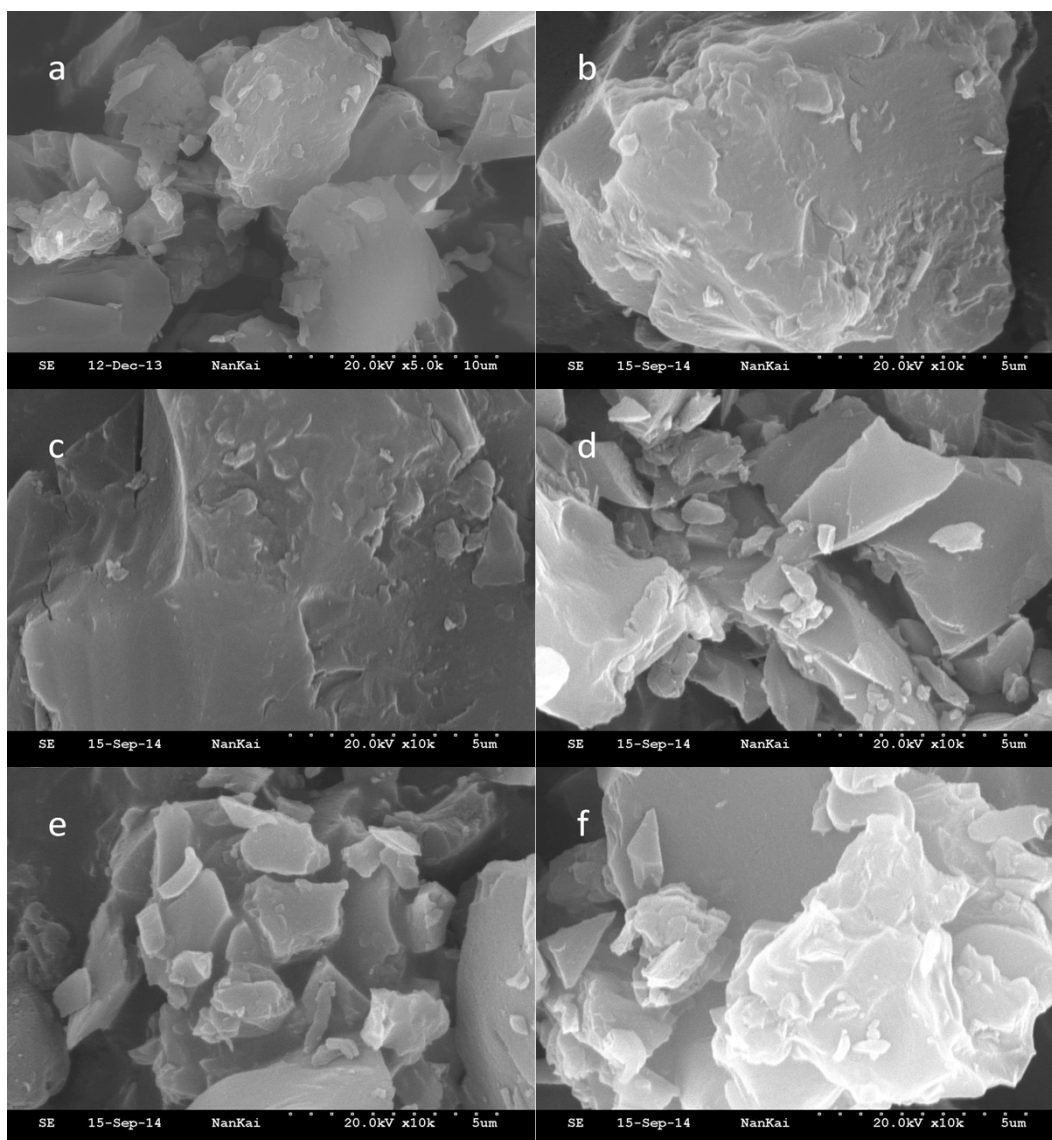

Figure S2. SEM images of catalyst layers of six air-cathodes magnified 5000 and 10000 times, which was the graph of (a)RAW-SP (bare AC), (b) SP-200 (AC treated at 200 °C), (c) SP-400 (AC treated at 400 °C), (d) SP-600 (AC treated at 600 °C), (e) SP-800 (AC treated at 800 °C) and (f) SP-1000 (AC treated at 1000 °C) respectively.

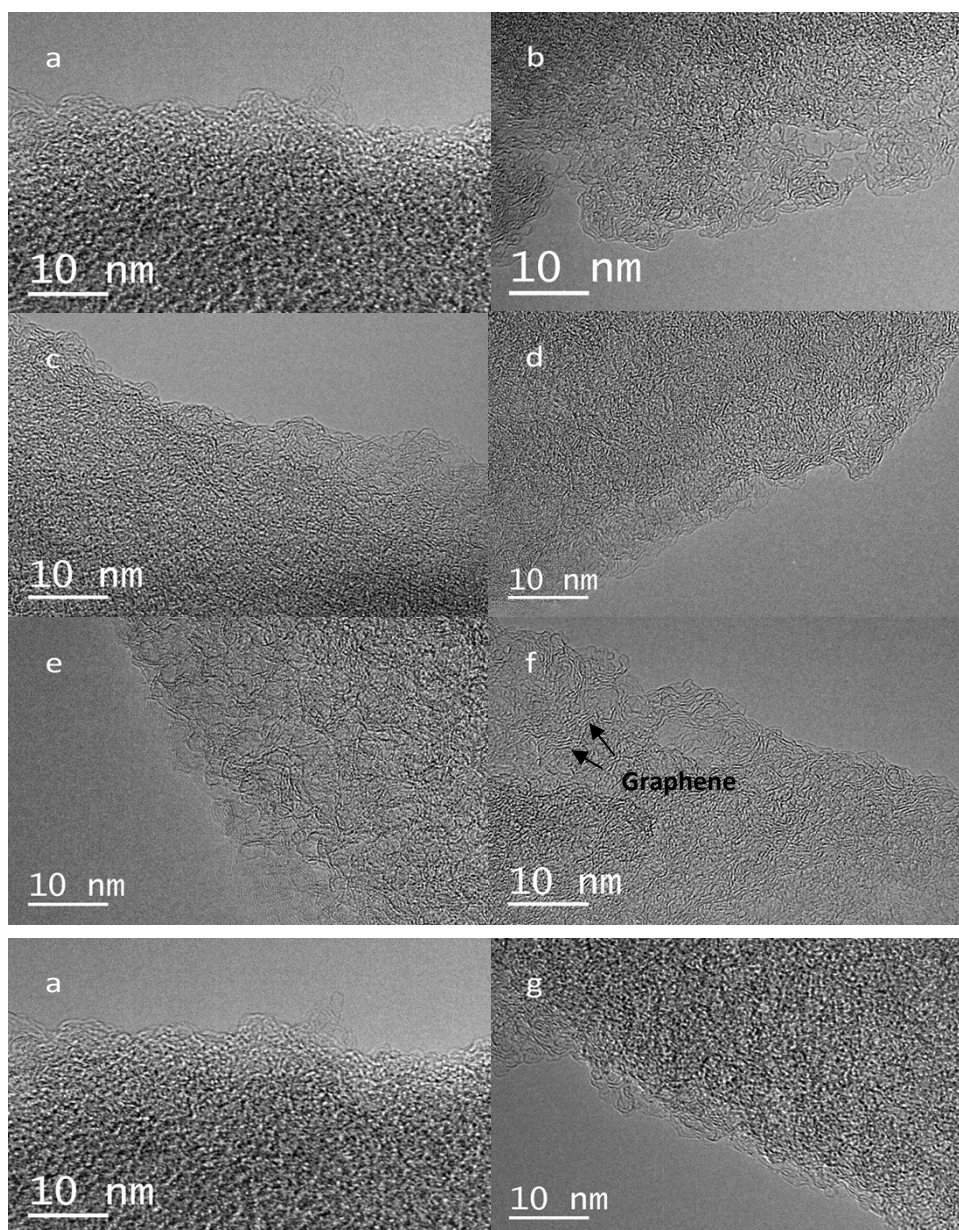

Figure S3. TEM images of catalyst layers of air-cathodes, which was the graph of (a) RAW-SP, (b) SP-200, (c) SP-400, (d) SP-600, (e) SP-800, (f) SP-1000 and (g) RAW-800 respectively.



Figure S4. X-ray photoelectron spectroscopy (XPS) survey spectra of RAW-SP, SP-200, SP-400, SP-600, SP-800 and SP-1000.

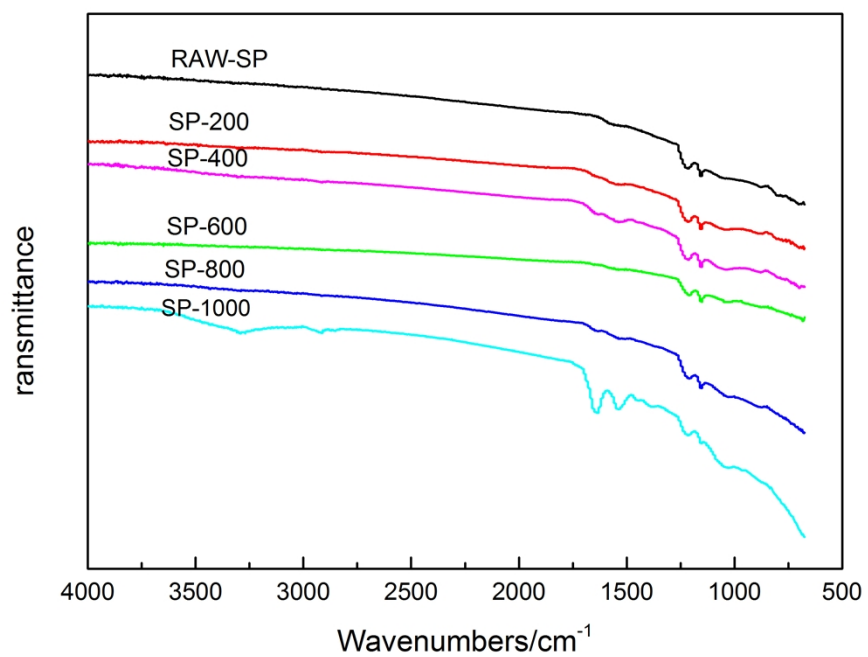

Figure S5. Fourier transform infrared (FTIR) spectra of RAW-SP, SP-200, SP-400, SP-600, SP-800 and SP-1000.

Table S1. The position of the D-band peaks and the G-band peaks for all samples.

|             | RAW-SP | RAW-800 | SP-200 | SP-400 | SP-600 | SP-800 | SP-1000 |
|-------------|--------|---------|--------|--------|--------|--------|---------|
| D-band peak | 1355   | 1356    | 1347   | 1346   | 1346   | 1345   | 1350    |
| G-band peak | 1593   | 1593    | 1599   | 1599   | 1596   | 1600   | 1600    |

## References

1. V. Gomez-Serrano, E. M. Cuerda-Correa, M. C. Fernandez-Gonzalez, M. F. Alexandre-Franco and A. Macias-Garcia, *Materials Letters*, 2005, **59**, 846-853.
2. B. S. Girgis, A. A. Attia and N. A. Fathy, *Colloid Surface A*, 2007, **299**, 79-87.
3. X. Wang, N. S. J. Gao, Q. X. Zhou, H. Dong, H. B. Yu and Y. J. Feng, *Bioresource Technol*, 2013, **144**, 632-636.
4. B. Corcho-Corral, M. Olivares-Marin, C. Fernandez-Gonzalez, V. Gomez-Serrano and A. Macias-Garcia, *Appl Surf Sci*, 2006, **252**, 5961-5966.
5. J. A. Cecilia, A. Infantes-Molina, E. Rodriguez-Castellon, A. Jimenez-Lopez and S. T. Oyama, *Appl Catal B-Environ*, 2013, **136**, 140-149.
6. C. X. Chen, B. A. Huang, T. Li and G. F. Wu, *Bioresources*, 2012, **7**, 5109-5116.
7. F. F. Li, Y. S. Jiang, M. S. Xia, M. M. Sun, B. Xue, D. R. Liu and X. G. Zhang, *J Phys Chem C*, 2009, **113**, 18134-18141.
8. X. G. Duan, S. Indrawirawan, H. Q. Sun and S. B. Wang, *Catal Today*, 2015, **249**, 184-191.
9. J. L. Figueiredo, M. F. R. Pereira, M. M. A. Freitas and J. J. M. Orfao, *Carbon*, 1999, **37**, 1379-1389.
